# Supplementary material for: Drinkable in situ-forming tough hydrogels for gastrointestinal therapeutics
Source: PubMed Central journal article supplement (PMC11364503; doi:10.1038/s41563-024-01811-5), 2024-02-27
Supplement: 41563_2024_1811_MOESM3_ESM.pdf [file 41563_2024_1811_MOESM3_ESM.pdf]

**Supplementary Table 1. Porcine blood chemistry after LIFT hydrogel administration**

| <b>time</b> | <b>ALP<br/>(U/L)</b> | <b>AST<br/>(U/L)</b> | <b>ALT<br/>(U/L)</b> | <b>BUN<br/>(mg/dL)</b> | <b>creatinine<br/>(mg/dL)</b> |
|-------------|----------------------|----------------------|----------------------|------------------------|-------------------------------|
| baseline    | 131.0 ± 25.7         | 18.7 ± 4.0           | 41.7 ± 6.8           | 8.7 ± 0.6              | 1.1 ± 0.1                     |
| 24 h        | 132.3 ± 22.5         | 22.3 ± 17.2          | 41.7 ± 6.1           | 12.7 ± 4.5             | 1.2 ± 0.2                     |
| 48 h        | 115.0 ± 16.5         | 22.3 ± 5.5           | 38.7 ± 5.9           | 9.0 ± 1.7              | 1.1 ± 0.2                     |

ALP, alkaline phosphatase; AST, aspartate aminotransferase; ALT, alanine transaminase; BUN, blood urea nitrogen. Baseline: sample was collected before LIFT hydrogel administration. An  $n = 3$  pigs were tested.
