# Supplementary material for: Drinkable in situ-forming tough hydrogels for gastrointestinal therapeutics
Source: PubMed Central journal article supplement (PMC11364503; doi:10.1038/s41563-024-01811-5), 2024-02-27
Supplement: 41563_2024_1811_MOESM4_ESM.pdf [file 41563_2024_1811_MOESM4_ESM.pdf]

**Supplementary Table 2. Cell lines.**

| cell line | vendor        | ICLAC misidentified cell line? | authenticated?                                                                  |
|-----------|---------------|--------------------------------|---------------------------------------------------------------------------------|
| Caco-2    | ATCC HTB-37   | no                             | authenticated, 2021-04-20                                                       |
| HT-29     | ATCC HTB-38   | no                             | authenticated, 2022-04-15                                                       |
| Hepa1-6   | ATCC CRL-1830 | no                             | did not submit for authentication                                               |
| CV-1      | ATCC CCL-70   | no                             | ATCC does not provide authentication services for non-human nor non-mouse cells |

ATCC, American Type Culture Collection; ICLAC, International Cell Line Authentication Committee, checked using Version 12 Table 1 (release date 2023-01-16); authentication was performed as follows by ATCC:

Seventeen short tandem repeat (STR) loci plus the gender determining locus, Amelogenin, were amplified using the commercially available PowerPlex® 18D Kit from Promega. The cell line sample was processed using the ABI Prism® 3500xl Genetic Analyzer. Data were analyzed using GeneMapper® ID-X v1.2 software (Applied Biosystems). Appropriate positive and negative controls were run and confirmed for each sample submitted.
