# Supplementary material for: Drinkable in situ-forming tough hydrogels for gastrointestinal therapeutics
Source: PubMed Central journal article supplement (PMC11364503; doi:10.1038/s41563-024-01811-5), 2024-02-27
Supplement: 41563_2024_1811_MOESM5_ESM.pdf [file 41563_2024_1811_MOESM5_ESM.pdf]

**Disclosures - Carlo Giovanni Traverso - encompassing all professional not-for-profit and for profit relationships**

**Date: March 7, 2023**

Please note that I make every effort to maintain this document up to date and as part of the disclosure process governed by the Sunshine Act further details can be found at:  
<https://openpaymentsdata.cms.gov/physician/431893>

**Employment and Professional Affiliations**

|                                                   | Position(s)                                                                                                  | Years                   |
|---------------------------------------------------|--------------------------------------------------------------------------------------------------------------|-------------------------|
| Trinity College, University of Cambridge          | Undergraduate student (1995-1998), Junior Research Fellow / Title A (2002-2007), Medical Student (2002-2006) | 1995-1998, 2002-2007    |
| Hospital for Sick Children, University of Toronto | Research Assistant (1997-1999)                                                                               | 1997-1999               |
| Johns Hopkins University                          | PhD graduate student (1998-2002), Post-doctoral fellow (2002-2003)                                           | 1998-2003               |
| Harvard Medical School                            | Fellow (2007-2014), Instructor (2014-2017), Assistant Professor, part time (2017-present)                    | 2007-present            |
| Brigham and Women's Hospital                      | Internal Medicine Resident (2007-2009), Attending Physician (2016-present)                                   | 2007-2009, 2016-present |
| Massachusetts Institute of Technology             | Research Affiliate (2009-2018), Visiting Scientist (2018-present), Assistant Professor (2019-present)        | 2009-present            |
| Massachusetts General Hospital                    | Gastroenterology Fellow (2009-2014), Attending Physician (2014-2015)                                         | 2009-2015               |

**For Profit**

|                            | Equity/Stock | Board/Advisor | Consultant | Royalties | Gifts | Grants/<br>Scholarship | Years        |
|----------------------------|--------------|---------------|------------|-----------|-------|------------------------|--------------|
| Exact Sciences             |              |               |            | x         |       |                        | 2002-        |
| Horizon                    |              |               |            | x         |       |                        | 2014-        |
| Pavoda                     | x            | x             | x          |           |       |                        | 2014-2016    |
| Entrega, Inc               |              |               | x          |           |       |                        | 2015         |
| CBSET                      |              |               | x          |           |       |                        | 2015         |
| Avaxia                     |              |               | x          |           |       |                        | 2015         |
| Lyndra                     | x            | x             |            | x         |       |                        | 2015-present |
| Novo Nordisk               |              |               | x          |           |       | x                      | 2015-present |
| SNS Nano                   |              |               | x          |           |       |                        | 2015-2016    |
| Hoffman la Roche           |              |               |            |           |       | x                      | 2015-2017    |
| Janssen                    |              |               |            |           |       |                        | 2016         |
| Egalet                     |              | x             | x          |           |       |                        | 2016         |
| Janssen                    |              |               | x          |           |       |                        | 2016         |
| BMS                        |              |               |            |           | x     |                        | 2016         |
| Synlogic                   |              |               | x          |           |       |                        | 2016-2018    |
| Freenome                   |              |               |            |           |       | x                      | 2016-2018    |
| Suono Bio                  | x            | x             |            | x         |       |                        | 2017-present |
| Merck                      |              |               | x          |           |       |                        | 2018         |
| Verily                     |              |               | x          |           |       |                        | 2018-2019    |
| Eagle Pharmaceuticals, Inc |              |               | x          |           |       |                        | 2018-present |
| Vivtex                     | x            | x             |            | x         |       |                        | 2018-present |
| Celero Systems             | x            | x             |            | x         |       |                        | 2018-present |
| Bilayer Therapeutics, Inc  | x            | x             |            | x         |       |                        | 2020-present |
| Teal Bio, Inc              | x            | x             |            | x         |       |                        | 2020-present |
| Oracle                     |              |               |            |           |       | x                      | 2020-2021    |
| Wired Consulting           |              |               | x          |           |       |                        | 2020         |
| Avadel Pharmaceuticals     |              |               | x          |           |       |                        | 2021         |
| Moderna                    |              |               | x          |           |       |                        | 2022-present |
| Syntis Bio                 | x            | x             | x          |           |       |                        | 2022-present |
| Vitakey                    | x            | x             | x          |           |       |                        | 2023-present |
| CSL Vifor                  |              |               |            |           |       | x                      | 2022-present |

**Not for Profit**

|                                                                     | Equity/Stock | Board/Advisor | Consultant | Royalties | Gifts | Grants/<br>Scholarship | Years           |
|---------------------------------------------------------------------|--------------|---------------|------------|-----------|-------|------------------------|-----------------|
| Draper Laboratory                                                   |              |               |            |           |       | x                      | 2015-2017       |
| MIT Lincoln Laboratory                                              |              |               |            |           |       | x                      | 2012, 2019-2020 |
| NIH/NIBIB                                                           |              |               |            |           |       | x                      | 2018-present    |
| Kenneth Rainin                                                      |              | x             |            |           |       |                        | 2015-2016       |
| Bill and Melinda Gates Foundation                                   |              |               |            |           |       | x                      | 2013-present    |
| NIH/NCI                                                             |              |               |            |           |       | x                      | 2018-present    |
| Johns Hopkins University / Technology Transfer Office               |              |               |            | x         |       |                        | 2002-present    |
| Massachusetts Institute of Technology / Technology Licensing Office |              |               |            | x         |       |                        | 2015-present    |
| Mass General Brigham Innovation / Technology Licensing              |              |               |            | x         |       |                        | 2018-present    |
| Cambridge Commonwealth and Overseas Trusts, Univ. of Cambridge      |              |               |            |           |       | x                      | 1995-1998       |
| Foulkes Foundation                                                  |              |               |            |           |       | x                      | 2003-2006       |
| Trinity College, University of Cambridge                            |              |               |            |           |       | x                      | 2003-2006       |
| The Leona M. and Harry B. Helmsley Charitable Trust                 |              |               |            |           |       | x                      | 2019-2022       |
| Karl van Tassel (1925) Career Development Professorship, MIT        |              |               |            |           |       | x                      | 2020-present    |
| Defense Advanced Research Projects Agency                           |              |               |            |           |       | x                      | 2021-present    |
